1 **Determining the Mutation Bias of Favipiravir in Influenza Using Next-**  
2 **generation Sequencing**

3 Daniel H. Goldhill<sup>1,2</sup>, Pinky Langat<sup>2</sup>, Hongyao Xie<sup>2</sup>, Monica Galiano<sup>1</sup>, Shahjahan Miah<sup>1</sup>, Paul  
4 Kellam<sup>2</sup>, Maria Zambon<sup>1</sup>, Angie Lackenby<sup>1</sup> and Wendy Barclay<sup>2</sup>#.

5 <sup>1</sup>Public Health England, London, UK; <sup>2</sup> Department of Virology, Faculty of Medicine, Imperial  
6 College, London, UK.

7 #Corresponding Author: [w.barclay@imperial.ac.uk](mailto:w.barclay@imperial.ac.uk)

8 Running Title- Mutation Bias of Favipiravir in Flu using NGS

9

10

## 11 **Abstract**

12 Favipiravir is a broad spectrum antiviral drug that may be used to treat influenza. Previous  
13 research has identified that favipiravir likely acts as a mutagen but the precise mutation bias  
14 that favipiravir induces in influenza virus RNAs has not been described. Here, we use next-  
15 generation sequencing (NGS) with barcoding of individual RNA molecules to accurately and  
16 quantitatively detect favipiravir-induced mutations and to sample orders of magnitude  
17 more mutations than would be possible through Sanger sequencing. We demonstrate that  
18 favipiravir causes mutations and show that favipiravir primarily acts as a guanine analogue  
19 and secondarily as an adenine analogue resulting in the accumulation of transition  
20 mutations. We also use a standard NGS pipeline to show that the mutagenic effect of  
21 favipiravir can be measured by whole genome sequencing of virus.

## 22 **Importance**

23 New antiviral drugs are needed as a first line of defence in the event of a novel influenza  
24 pandemic. Favipiravir is a broad-spectrum antiviral which is effective against influenza. The  
25 exact mechanism of how favipiravir works to inhibit influenza is still unclear. We used next-  
26 generation sequencing (NGS) to demonstrate that favipiravir causes mutations in influenza  
27 RNA. The greater depth of NGS sequence information over traditional sequencing methods  
28 allowed us to precisely determine the bias of particular mutations caused by favipiravir. NGS  
29 can also be used in a standard diagnostic pipeline to show that favipiravir is acting on the  
30 virus by revealing the mutation bias pattern typical to the drug. Our work will aid in testing  
31 whether viruses are resistant to favipiravir and may help demonstrate the effect of

32 favipiravir on viruses in a clinical setting. This will be important if favipiravir is used during a  
33 future influenza pandemic.

34 **Keywords:** Influenza, Favipiravir, Mutation bias, Next-generation sequencing, Primer ID.

35

## 36 Introduction

37 Influenza virus is responsible for the deaths of between 290,000-650,000 people  
38 globally each year<sup>1</sup>. The emergence of a novel strain of influenza in humans could lead to an  
39 influenza pandemic with significant mortality worldwide<sup>2</sup>. Whilst vaccination provides good  
40 levels of protection against seasonal influenza, at the start of a pandemic, antiviral drugs  
41 would be the frontline of defence during a period of development of a specific vaccine<sup>3</sup>.  
42 Historically, there have been only two licensed classes of antiviral drug for influenza:  
43 adamantanes and Neuraminidase inhibitors (NAIs). Adamantanes are no longer in clinical  
44 use as almost all circulating viruses are resistant<sup>4,5</sup>. Furthermore, some previous seasonal  
45 viruses have shown high levels of resistance to the most commonly administered NAI,  
46 oseltamivir<sup>6</sup> and oseltamivir resistant A(H7N9) viruses with pandemic potential have  
47 emerged and are transmissible between ferrets<sup>7-9</sup>. New drugs are needed for treatment of  
48 seasonal influenza as well as for pandemic preparedness and a number of drug classes are  
49 under development including compounds that target the viral RNA dependent RNA  
50 polymerase (RdRP)<sup>10</sup>. In 2014, Favipiravir, an antiviral drug developed by Toyama, was  
51 licensed for use in Japan against emerging influenza viruses that exhibit resistance to other  
52 antivirals<sup>11</sup>. However, the exact mechanism through which favipiravir exerts an antiviral  
53 effect on influenza is unclear. An increased knowledge of the mechanism of action of  
54 favipiravir could be useful in determining whether specific viruses are less susceptible and  
55 evaluating the potential for emergence and transmission of resistant viruses.

56 Favipiravir is a nucleoside analogue that is active against all subtypes of influenza  
57 and has shown a potent antiviral effect both *in vitro* and *in vivo*<sup>12-17</sup>. Favipiravir has  
58 completed a phase III clinical trial in Japan and has undergone a phase III trial in the USA<sup>18</sup>.

59 Favipiravir has also been shown to be active *in vitro* and in animal models against a wide  
60 range of RNA viruses, some for which there are no licensed drugs as a treatment option<sup>18-25</sup>.  
61 There is strong evidence that favipiravir acts as a mutagen by incorporating into both  
62 positive and negative stranded RNA and being aberrantly copied as multiple bases<sup>15,26-30</sup>.  
63 This is thought to be a different mechanism of action from ribavirin, another broadly acting  
64 nucleoside analogue that has been used previously to treat influenza<sup>26,31</sup>. Studies have  
65 shown that favipiravir competes against guanine and adenine to be incorporated into RNA  
66 and is non-competitive against cytosine and uracil<sup>30,32-34</sup>. This would suggest that favipiravir  
67 acts as a purine analogue and should cause mostly transition mutations. Studies measuring  
68 the mutation bias of favipiravir in influenza have had mixed results. Baranovich *et al.* used  
69 Sanger sequencing of virus passaged in presence of drug to show a C->U and a G->A  
70 mutation bias as expected but also saw a G->U mutation bias after 48hrs of exposure to  
71 favipiravir<sup>27</sup>. Vanderlinden *et al.* also used Sanger sequencing to show a C->U and G->A bias  
72 following a passaging experiment and showed an increase in Shannon entropy using next-  
73 generation sequencing (NGS)<sup>35</sup>. However, in contrast to studies using Sanger sequencing,  
74 Marathe *et al.* reported a slight bias towards transversions in influenza infected mice  
75 treated with favipiravir using NGS<sup>36</sup>. Studies with other viruses have given mutation patterns  
76 which suggest that favipiravir acts as a purine analogue<sup>28,29,37,38</sup>. Interestingly, several  
77 studies with favipiravir and influenza have suggested that favipiravir acts not as a mutagen  
78 but as a chain terminator preventing the extension of the RNA strand following  
79 incorporation<sup>32,33</sup>. A primer extension study suggested that the block could occur with a  
80 single molecule of favipiravir<sup>32</sup> but other studies have suggested that chain termination  
81 occurs following the incorporation of two molecules of favipiravir<sup>30,33,34</sup>.

82           In this study, we used next generation sequencing to determine the mutation bias of  
83 favipiravir on influenza virus RNAs. We employed two methods of analysis: the first method  
84 uses Primer ID which is a technique for labelling each individual RNA molecule with a  
85 barcode to account for PCR and sequencing errors<sup>39-41</sup>. This technique can very precisely  
86 uncover the mutation bias by analysing small, targeted areas of the genome. The second  
87 method developed a novel analysis of data obtained from a standard sequencing pipeline as  
88 would be found in many National Influenza Centres or public health laboratories. This  
89 showed the mutation bias induced by drug treatment over the whole genome was similar to  
90 that detected using the precise Primer ID methodology and confirmed that the effect of  
91 favipiravir could be readily measured using NGS from a standard sequencing pipeline.

92

## 93 **Methods**

### 94 **Reagents, Cells and Viruses**

95 Favipiravir was kindly provided by Toyama Chemical Company under an MTA and  
96 reconstituted in DMSO and frozen into aliquots. MDCK and 293-T cells were grown in  
97 Dulbecco's modified Eagle's medium (DMEM; Gibco) with the addition of 10% Fetal Bovine  
98 Serum (labtech.com), 1% non-essential amino acids (Gibco) and 1% penicillin/streptomycin  
99 (Sigma-Aldrich). A/England/195/2009 (Eng195) is an early isolate from the 2009 A(H1N1)  
100 pandemic provided by Public Health England (PHE).

### 101 **Minigenome Assay**

102 Four pCAGGS plasmids encoding the polymerase (PA, PB1 and PB2) and NP from influenza  
103 A/England/195/2009 A(H1N1)pdm09 virus, were transfected using Lipofectamine 3000

104 (Invitrogen) into 293T cells in 24 well plates. In addition, we transfected plasmids directing  
105 expression from a Poll promoter of either a Firefly luciferase gene in negative sense flanked  
106 with influenza A non-coding sequence from the NS segment or the HA gene segment from  
107 influenza A/Victoria/3/75 H3N2 virus (Vic75), and a Poll Renilla luciferase plasmid as a  
108 transfection control. Cells were lysed with 200µl of passive lysis buffer (Promega) and  
109 polymerase activity was measured using Dual-Luciferase Reporter Assay (Promega) on the  
110 FLUOstar Omega plate reader (BMG Labtech). Polymerase activity is reported as Firefly  
111 luciferase activity normalized by Renilla activity.

### 112 **Next-Generation Sequencing with Primer ID**

113 At 24 hours after transfection, 293T cells from the minigenome assay were lysed and RNA  
114 was extracted using the RNA mini kit (Qiagen). The reverse transcription primer for primer  
115 ID (5'-TGCGTTGATAACCACTGCTTTNNNNTNNNNTNNNCCCAGTCCAAGTGAAACCCTC-3')  
116 consisted of a PCR tag, random barcode of the form NNNNTNNNNTNNNN and sequence  
117 specific to the H3 HA. Reverse transcription was performed with Superscript III (Thermo  
118 Fisher). qPCR using SYBR green (Thermo Fisher) was used to calculate the number of cDNA  
119 molecules to use for each PCR reaction. 20,000-40,000 molecules were used for each  
120 reaction. The PCR primers were 5'-CGGGGAAAATATGCAACAATCCT-3' and 5'-  
121 TGCGTTGATAACCACTGCTTT. The PCR product was designed to be 279 bases to avoid any  
122 fragmentation step during sample preparation ensuring the barcode was not sheared from  
123 the sample. Sample preparation was performed using the NEBNext Ultra kit (NEB). Samples  
124 were sequenced giving 150bp paired end reads on an Illumina MiSeq. Sequencing data for  
125 the samples were processed and analysed using custom scripts in Python and R. Reads were  
126 first paired to form a single sequence and subjected to quality control using QUASR v7.01<sup>42</sup>

127 to retain reads with a median phred score of 20 and minimum read length of 250bp. Intact  
128 barcode sequences were extracted from the read pairs; any sequences without a fully  
129 formed barcode or with errors in the internal Ts of the barcode were discarded. Consensus  
130 sequences were generated for each barcode that had more than three reads with the  
131 consensus taken as the majority of the reads. Samples for which there was no majority read  
132 were discarded as potentially this could be an example of two RNA sequences having the  
133 same barcode<sup>43</sup>. The consensus sequences were mapped and compared to the Vic75  
134 reference and any variants were extracted. We subsequently decided to use a more  
135 stringent cut-off of four reads per barcode to minimize errors caused by barcodes with a low  
136 number of reads. We present all our sequencing results as mutations in positive orientation  
137 as would have been seen in the mRNA.

138

### 139 **qPCR**

140 RNA was extracted from the mini-genome assay. Specific primers were used to reverse  
141 transcribe mRNA from the firefly luciferase as previously described<sup>44</sup>. qPCR was performed  
142 with SYBR Green using 18S RNA as a control.  $\Delta\Delta C_t$  was calculated and the results are shown  
143 normalized to the drug free control.

144

### 145 **Next-Generation Viral Sequencing with Primer ID**

146  $1.2 \times 10^6$  cells were inoculated with Eng195 at a MOI of 1.5 and incubated at 37°C for 18  
147 hours in serum free media with added 1 $\mu$ g/ml trypsin (Worthington) and with different  
148 concentrations of favipiravir diluted in DMSO. Control wells contained DMSO without  
149 favipiravir. After 18 hours, samples were taken from the supernatant and plaqued on MDCK



150 cells to determine final viral titre. RNA was extracted from the cells using RNEasy kit  
151 (Qiagen). Sequencing was performed as described above with the exception that the Primer  
152 ID RT primer contained sequence specific for PB1 vRNA (5'-  
153 TGTCCAGCACGCTTCAGGCTNNNNTNNNNTNNNNAGAAGATGGTCACGCAAAGAA-3') and the  
154 PCR product was 302 bases long including the PCR primers (5'-TCACAACATTTGCCAGTTTGG-  
155 3', 5'-TGTCCAGCACGCTTCAGGCT-3'). On analysing the sequencing data, a site which varied  
156 considerably in all samples was detected which was likely a polymorphism in the initial  
157 population. This site was removed from all analyses.

### 158 **Next-Generation Sequencing without primer ID**

159  $1.2 \times 10^6$  cells were inoculated with England 195 at a MOI of 1 and incubated at 37°C for 24  
160 hours as described above. Control wells contained DMSO but no favipiravir. After 24 hours,  
161 samples were taken from the media and titred on MDCK cells by plaque assay. Whole  
162 genome next generation sequencing was performed using a pipeline at Public Health  
163 England. RNA was extracted from viral lysate using easyMAG (bioMérieux). One step  
164 Reverse-Transcription-PCR was performed with Superscript III (Invitrogen), Platinum Taq  
165 HiFi Polymerase (Thermo Fisher) and influenza specific primers<sup>45</sup>. Samples were prepared  
166 for NGS using Nextera library preparation kit (Illumina). Samples were sequenced on an  
167 Illumina MiSeq generating a 150-bp paired end reads. Reads were mapped with BWA v0.7.5  
168 and converted to BAM files using SAMTools (1.1.2). Variants were called using QuasiBAM,  
169 an in-house script at Public Health England. Samples were compared using a permutation  
170 analysis to calculate the probability of a magnitude of mutation bias as great as observed  
171 given the mutations in the samples. Permutation analyses were performed in R with 10,000  
172 iterations for each analysis. Mutations were randomised between two samples maintaining

173 the number of mutations found within each sample. The magnitude of the mutation bias  
174 was then calculated as the sum of the absolute value of the difference in the relative  
175 proportions of each mutation type. The p value was then calculated as the number of  
176 iterations/10000 with a value greater than the observed value. A further permutation  
177 analysis calculated the probability of a bias of guanine analogue mutations (e.g. C->U and G-  
178 >A). This analysis was performed as above but only used the sum of the absolute value of  
179 the difference in the relative proportions of C->U and G->A.

## 180 **Results**

### 181 **Primer ID allows calculation of mutation bias and relative mutation rate**

182 In order to determine the mutagenic effect of favipiravir, we employed next generation  
183 sequencing using Primer ID to analyse the products of a minigenome assay<sup>46</sup>, which allowed  
184 for the unbiased measurement of mutations (Figure 1). When sequencing virus, particularly  
185 over several rounds of replication, a proportion of possible mutations will not be measured  
186 as they would cause too large a fitness cost to the virus and thus will not be amplified. To  
187 avoid this scenario, we sequenced the reporter gene from the minigenome assay as the  
188 reporter protein has no effect on further RNA accumulation. Thus, this strategy should  
189 reveal the complete spectrum of mutations caused by replication in the presence of  
190 favipiravir. Primer ID is a method which labels each molecule of RNA with a unique barcode  
191 (Figure 1). This method allowed us to examine a large number of independent mutational  
192 events as each mutation could be associated with an individual RNA molecule. In addition,  
193 by comparing multiple sequencing reads with the same barcode, we could remove  
194 sequencing errors as these would not appear in the majority of the reads. The sample  
195 without favipiravir provides a baseline mutation rate consisting of the background mutation

196 rate of the influenza virus polymerase plus mutations caused by the reverse transcriptase  
197 during reverse transcription. Drug-treated samples can be compared to this sample to  
198 measure how favipiravir increased the mutation rate.

199 We reconstituted influenza RdRP in situ by expressing the polymerase proteins and  
200 nucleoprotein from transfected plasmids. We introduced two viral-like RNA templates, one  
201 in which the authentic open reading frame was replaced by the firefly luciferase gene, and  
202 one that represented RNA segment 4 and encoded H3 haemagglutinin (HA). The transfected  
203 cells were incubated in the presence of favipiravir. Increasing concentrations of favipiravir  
204 from 1 to 100  $\mu$ M caused a reduction in the activity of the luciferase reporter (Figure 2A).  
205 However, qRT-PCR analysis of the amount of H3 HA mRNA accumulated revealed no  
206 decrease in mRNA levels that would account for the loss of luciferase activity at least up to  
207 50  $\mu$ M drug (Figure 2B). At 100  $\mu$ M favipiravir, there was a significant reduction in mRNA  
208 ( $P < 0.0001$ ). This suggested that at doses up to 50  $\mu$ M, the inhibitory effect of favipiravir in  
209 the minigenome assay was caused by mutagenesis and not through chain termination,  
210 which could have played a role at the highest dose of drug.

211 In order to test how favipiravir affected the mutation rate of the reconstituted viral  
212 polymerase, we sequenced the positive stranded H3 HA RNAs. As each individual barcode  
213 represents a single RNA molecule, we calculated consensus sequences for each barcode.  
214 Mutations which did not appear in a majority of reads were ascribed to PCR or sequencing  
215 error and removed from further analyses. In total, we analysed 6,623 substitutions in  
216 ~6,900,000 bases of sequencing data. Figure 2C shows the number of mutations per 10,000  
217 nucleotides above the baseline (0  $\mu$ M favipiravir) for each sample. As the concentration of  
218 favipiravir increased, the number of mutations increased. At the highest concentration of

219 favipiravir tested (100  $\mu$ M), there would be an additional 15 errors per 10,000 nucleotides  
220 on average compared to the control. We varied the cut-off for the number of sequencing  
221 reads needed to include a barcode (Supplemental figure 1). The choice of cut-off did not  
222 significantly alter the results for values <10 reads. We chose a cut-off of 4 reads per barcode  
223 as this removed some errors associated with low numbers of reads per barcode whilst  
224 including the majority of the data.

225 We next categorised the mutations identified by sequencing as transitions or transversions,  
226 or as the individual base-pair mutations (Figure 2D, E). Our results confirmed that the main  
227 cause of the increase in mutation rate was transition mutations (Figure 2D). There was no  
228 increase in the rate of transversion mutations as the concentration of favipiravir increased  
229 (F-test,  $F = 0.4593$ , d.f. 1,4,  $p = 0.5351$ ). Figure 2E shows the increase in the likelihood of  
230 different categories of mutations compared to the control. The most common transitions  
231 were C->U and G->A mutations that would be induced when favipiravir is acting as a  
232 guanine analogue. However, there was also a smaller increase in the reverse transitions  
233 from U->C and A->G where favipiravir acts as an adenine analogue. On average, there was  
234 an approximately 3.5-fold increase in the rate of C->U or G->A mutations compared to a U-  
235 >C or A->G mutations.

### 236 **Primer ID sequencing of viruses confirms that favipiravir causes mutations**

237 We next tested whether we could use Primer ID to measure the increase in mutation rate of  
238 RNAs generated during virus infection. To minimize the loss of viral RNAs that contained  
239 mutations rendering the virus nonviable, we infected cells at a high MOI so that there was  
240 only a single replication cycle. We first confirmed that favipiravir inhibited influenza under  
241 these conditions (Figure 3A). There was a greater than 1000-fold reduction in infectious titre

242 of influenza A/Eng195/2009 A(H1N1)pdm09 virus (Eng 195) after 24 hours infection at high  
243 concentrations of favipiravir and a 10-fold reduction at 1  $\mu$ M drug. We extracted RNA from  
244 the cells and sequenced the vRNA of RNA segment 2 with appropriate barcoded primers. In  
245 total, we analysed  $\sim$ 56,000,000 bases and found 25,441 substitutions. All concentrations of  
246 favipiravir showed an increase in mutation rate compared to the no drug control (Figure  
247 3B). The mutation rate caused by favipiravir was  $\sim$ 3 fold higher at 10  $\mu$ M than at 1  $\mu$ M, but  
248 surprisingly, the mutation rate at 100  $\mu$ M favipiravir was lower than at 10  $\mu$ M. The increase  
249 in mutation rate at all concentrations of favipiravir was almost entirely due to transitions  
250 (Figure 3C). The mutation bias measured was subtly different than that seen using the  
251 minigenome assay with C $\rightarrow$ U occurring most often but G $\rightarrow$ A and U $\rightarrow$ C mutations occurring  
252 at comparable rates (Figure 3D). This suggests that there was a higher rate of incorporation  
253 of favipiravir during negative strand synthesis compared to positive strand synthesis in virus  
254 infected cells (see Figure 5).

### 255 **Next generation sequencing can reveal mutation bias**

256 The experiments with Primer ID showed the mutation rate and bias for a small targeted  
257 portion of influenza genome. Next, we wanted to test whether we could measure the  
258 mutagenic effect of favipiravir using a standard NGS pipeline typical of those in public health  
259 laboratories (Supplemental figure 2). Eng195 virus was propagated at a high MOI for 24  
260 hours in the presence of 10 or 100  $\mu$ M favipiravir. The supernatant was plaqued to confirm  
261 that favipiravir had an inhibitory effect on the virus and there was  $>2$  log inhibition at 10  $\mu$ M  
262 and  $>4$  log inhibition at 100  $\mu$ M. We extracted RNA from virus particles in the supernatant  
263 and used next generation sequencing to obtain sequence data from the population of  
264 surviving viruses. In order to analyse mutation bias using next generation data, it is

265 necessary to ensure that the mutations used for the analysis are independent so that the  
266 same mutation occurring on multiple reads is not counted as multiple mutational events but  
267 as a single mutational event. Therefore, we treated each base in the influenza genome  
268 independently and recorded only the most common mutation (if any) for each site  
269 (Supplemental figure 2). Taking these sites in aggregate will give a combination of true  
270 mutations as well as other sources of error, most notably sequencing error. Figure 4 shows  
271 the sum of mutations over the whole genome for viruses propagated in 10  $\mu$ M or 100  $\mu$ M  
272 favipiravir or for control viruses which were not exposed to favipiravir. Comparing the  
273 pattern of mutations between the control viruses and the viruses exposed to drug allowed  
274 us to control for sequencing errors. The pattern of mutations seen in both samples exposed  
275 to favipiravir were significantly different to the control (Permutation analysis,  $p < 1 * 10^{-4}$ ;  
276 Supplemental figure 3A, 3C.) The mutation bias was caused by an excess of C->U and G->A  
277 transitions compared with the control viruses (Permutation analysis,  $p < 1 * 10^{-4}$ ,  
278 Supplemental figure 3B, 3D). There was no significant difference between the mutation bias  
279 at the two different concentrations of favipiravir tested (Permutation Analysis,  $p = 0.26$ ,  
280 Supplemental figure 3E, 3F). To demonstrate further that this method measures a true  
281 mutational signal, we took the 500 sites with the highest degree of polymorphism and  
282 repeated the analysis (Supplemental figure 4). The new analysis showed an increased effect  
283 size strongly suggesting that mutations caused by favipiravir lead to a signal in the  
284 sequencing data that is not masked by sequencing error. We chose to use the relative  
285 proportion of the mutation types to compare between samples as opposed to the absolute  
286 number of polymorphisms. This was a conservative choice as there may be biases between  
287 samples which could affect the absolute number of polymorphism due to the number of  
288 viruses in the sample.

289

## 290 **Discussion**

291 In this study, we used two different methods of analysing next-generation sequencing data  
292 in order to show that favipiravir acts as a mutagen with a distinct bias to induce transitions  
293 in influenza virus RNAs. The first method used Primer ID to measure precisely the increase in  
294 mutation rate and the mutation bias of the influenza polymerase caused by favipiravir in an  
295 *in vitro* system. We confirmed that favipiravir has a bias for transition mutations and acts as  
296 a purine analogue<sup>17,26,32,33</sup>. We were able to demonstrate that favipiravir competed  
297 primarily with guanine and secondarily with adenine resulting in an increase in C->U and G-  
298 >A mutations at higher concentrations of drug and a lower rate of increase in U->C and A->G  
299 mutations (Figure 5). The second method used data from whole-genome sequencing of  
300 viruses that had been exposed to favipiravir during single cycle replication and showed that  
301 viral populations exposed to favipiravir had a distinct bias for transition mutations,  
302 specifically C->U and G->A mutations.

303 Previous methods of sequence analysis for determining mutation bias in influenza RNAs  
304 induced by favipiravir have relied on Sanger sequencing of individual viral clones<sup>27,31</sup>. This  
305 technique is laborious and results in the detection of relatively few mutations: on the order  
306 of 100 mutations for an entire experiment<sup>27,31</sup>. Furthermore, the technique can be biased  
307 due to selection of beneficial mutations which may appear in multiple clones or to  
308 accidentally counting an initial polymorphism in the population as a mutational event that  
309 occurred in multiple clones. Sequencing a small region of the genome across many clones is  
310 especially prone to this error. Next-generation sequencing with Primer ID is a powerful

311 technique which allowed us to examine orders of magnitude more mutations than Sanger  
312 sequencing and was less prone to biases present in examining a small number of mutations.  
313 Primer ID allowed us to remove sequencing error from next-generation sequencing data and  
314 to detect changes in mutation rate and mutation bias<sup>39,40</sup>. Primer ID identified thousands of  
315 mutations in a single sample exposed to favipiravir, a number which would be impractical  
316 using Sanger sequencing. We were able to show that favipiravir acts as both a guanine and  
317 an adenine analogue whereas Sanger sequencing was not sensitive enough to measure the  
318 lower rate of adenine mutations<sup>27</sup>.

319 The use of the minigenome assay allowed us to see all mutations generated by polymerase  
320 and not just those that would allow viable viruses. Pauly *et al.* have recently shown that the  
321 mutation rate for influenza has been significantly underestimated by only counting  
322 mutations which occur in plaque forming viruses<sup>47</sup>. Sequencing only viruses which have  
323 exited the cell ignores mutations that cause defects in packaging or cellular exit. By contrast,  
324 as the mRNA from the reporter in the minigenome assay is not translated to a protein that  
325 can impact on viral fitness, the full spectrum of drug-induced mutations can be seen.

326 Allowing for multiple rounds of virus replication makes it difficult to see strongly deleterious  
327 mutations, which make up a significant proportion of the mutations for influenza, because  
328 they are selected against<sup>48</sup>. The minigenome assay has no selection on mutations and does  
329 not suffer from this bias. However, when we used a Primer ID approach to sequence a small  
330 portion of the viral genome from PB1 amplified during virus infection rather than in the  
331 minigenome assay, we found, contrary to the minigenome sequencing, that there was no  
332 increase in the mutation rate at the highest concentrations of favipiravir. This is likely due to  
333 selection against deleterious mutations that occurs even in a single cycle of replication.



334 Favipiravir causes mutations randomly and therefore there will be a distribution in the  
335 number of mutations during each strand replication. Some RNAs will have many mutations  
336 whereas others will have fewer. The majority of the RNA that was sequenced will come  
337 from viruses which have suffered few mutations, as viral RNAs with more mutations will  
338 interfere with ongoing replication. Therefore, the more successful favipiravir is at causing  
339 mutations, the greater the bias to sequencing the small number of viruses with fewer  
340 mutations. This most likely explains why the mutation rate we measured appeared lower at  
341 100  $\mu$ M favipiravir than at 10  $\mu$ M.

342 Although Primer ID can remove sequencing error, it is still impossible to distinguish between  
343 errors due to the flu polymerase and the reverse transcriptase used during the Primer ID  
344 reaction. A recent paper has suggested that care must be taken as these two error rates are  
345 the same order of magnitude<sup>47</sup>. For this reason, we have not reported an absolute error rate  
346 but a relative error rate compared to the drug-free baseline sample. However, for our  
347 experiments, the mutation rate caused by favipiravir was much higher than the calculated  
348 baseline mutation rate caused by reverse transcription errors plus errors naturally caused by  
349 the influenza polymerase. Furthermore, as all samples underwent identical processing,  
350 there is no reason to believe that the error rate during reverse transcription differed  
351 between samples and therefore, this is unlikely to bias our data. Care would need to be  
352 taken before comparing samples which have not been prepared concurrently especially if  
353 using different reverse transcription enzymes.

354

355 One disadvantage to Primer ID is that it sequences only a small part of the genome. This  
356 potentially could lead to mutation biases if that part of the genome was under strong

357 selection or due to local sequence structure. As we sampled only one region of the HA, we  
358 could not test whether there were specific structural differences between the HA sequence  
359 and other flu segments leading to mutational hotspots. However, the similarity between our  
360 analysis of RNAs from primer ID vs whole genome sequencing suggests we did not  
361 inadvertently sample a mutational hotspot. The precision and ease with which Primer ID  
362 was able to distinguish mutation bias and observe changes in mutation rate leads us to  
363 suggest that it could become a standard method for analysing the effects of nucleoside  
364 analogues and other mutagenic drugs.

365 Our second method of analysis sequenced the whole flu genome in populations of viruses  
366 that had been exposed to favipiravir and a control population that was not exposed to the  
367 drug as might be found in a clinical setting. The main disadvantage of this technique is that it  
368 is unable to distinguish between sequencing error and 'true' errors caused by the flu  
369 polymerase. Therefore, it is not possible to quantify the actual number of errors due to  
370 polymerase nor was the method sensitive enough to demonstrate any increase in the rate  
371 of U->C and A->G mutations. Despite these limitations, there are several advantages to this  
372 method that may prove to be of use in clinical settings. This method is extremely simple to  
373 use as the viruses can be entered into the standard influenza sequencing pipeline without  
374 any additional processing steps and could also be used to reanalyse data that had been  
375 previously collected. The analysis also encompasses the whole genome and so is resistant to  
376 any biases caused by local RNA structure nor is it biased by single polymorphisms that may  
377 have been present in the initial populations. If favipiravir is used in a clinical setting, this  
378 method may be a simple way to show that favipiravir is having a measurable effect by  
379 comparing viral mutations in pre-treatment and post-treatment samples.

380 In contrast to our finding that favipiravir acts as a purine analogue, a previous study that  
381 used NGS to determine the mutation bias of favipiravir *in vivo* found an excess of  
382 transversion mutations<sup>36</sup>. The analysis in Marathe *et al.* counted each individual NGS read as  
383 a separate mutational event, which may have led to a bias, as mutations from pre-existing  
384 polymorphisms or mutations that are positively selected will be counted multiple times. By  
385 contrast, our method of analysing NGS data ensured that mutations were independent by  
386 only counting one mutation at each site in the genome (Supplemental figure 2). Many  
387 recent papers that analyse NGS data use a cut off e.g. 5% or 1% of reads below which  
388 variants are not counted<sup>31,36,38</sup>. However, using a cut-off discards a large amount of the  
389 sequence data as only a small proportion of sites are included. Our analysis (Figure 4,  
390 Supplemental figure 2) used all the sequencing data without imposing a cut-off and this led  
391 to increased noise in the data but ensured that there was no bias towards pre-existing  
392 polymorphisms or variations in sequencing depth. We also tested the mutational bias by  
393 only counting the 500 sites with the largest degree of polymorphism (Supplemental figure 4)  
394 which showed similar results to our main analysis though potentially with less noise. This  
395 suggests that imposing a cut-off on variants will not bias the results if the sequencing  
396 contains enough variants that positive selection and pre-existing polymorphisms are unlikely  
397 to influence the results.

398 Our data showed that favipiravir acts as a mutagen with a bias towards transitions in  
399 agreement with most other studies of this drug's effect on RNA viruses<sup>27,28,35</sup>. We found that  
400 at lower concentrations of favipiravir, there was no evidence that the drug was acting as a  
401 chain terminator as there was no reduction in the amount of mRNA despite a reduction in  
402 reporter gene activity (Figure 2A, B). At the highest concentration tested (100  $\mu$ M), there

403 was a reduction in mRNA which could have been caused by chain termination or through  
404 introduced mutations preventing RNA replication. The lack of evidence for chain  
405 termination at lower concentrations of favipiravir suggests that favipiravir is primarily acting  
406 as a mutagen. Biochemically, favipiravir acts as a purine analogue binding to either C or U in  
407 place of G or A respectively. The most common mutations caused by favipiravir were C->U  
408 and G->A. These mutations were caused by favipiravir binding to C in place of a G on the  
409 positive or negative strand synthesis and subsequently pairing with a U in the next synthesis  
410 cycle (Figure 5). The reverse transitions caused by favipiravir binding to U happened at a  
411 ~3.5-fold lower rate. This confirms that favipiravir is most competitive against G as had been  
412 previously seen in primer extension assays<sup>32,33</sup>.

413 Next-generation Sequencing is a powerful technique for analysing mutational data and  
414 determining mutational biases. Care must be taken to perform analyses which minimize  
415 potential biases by ensuring that mutations are only counted when they occur  
416 independently of each other. We used NGS to show that favipiravir is acting as a mutagen  
417 causing multiple additional mutations per influenza genome on average at higher  
418 concentrations of favipiravir. Lethal mutagenesis of influenza is a viable antiviral strategy  
419 and may be difficult to evolve resistance against clinically<sup>49</sup>. Our increased knowledge of the  
420 precise mechanism of favipiravir means that we are better placed to test whether the drug  
421 is having a clinical effect as well as to see whether viruses are becoming resistant to  
422 favipiravir. This will be important when this drug is used in a pandemic situation.

### 423 **Acknowledgments**

424 This work was supported by the National Institute for Health Research Health  
425 Protection Research Unit (NIHR HPRU) in Respiratory Infections at Imperial College in

426 partnership with Public Health England (PHE). PL, PK and WB were supported by Wellcome  
427 Trust Grant 200187/Z/15/Z. The views expressed are those of the authors and not necessarily  
428 those of the NHS, the NIHR, the Department of Health or PHE.

429

## 430 References

- 431 1 WHO. *Influenza (Seasonal) Factsheet.*, <[http://www.who.int/en/news-room/fact-](http://www.who.int/en/news-room/fact-sheets/detail/influenza-(seasonal))  
432 [sheets/detail/influenza-\(seasonal\)](http://www.who.int/en/news-room/fact-sheets/detail/influenza-(seasonal))> (2018).
- 433 2 Ferguson, N. M. *et al.* Strategies for mitigating an influenza pandemic. *Nature* **442**, 448  
434 (2006).
- 435 3 Fauci, A. S. Seasonal and pandemic influenza preparedness: science and countermeasures.  
436 *Journal of Infectious Diseases* **194**, S73-S76 (2006).
- 437 4 Deyde, V. M. *et al.* Surveillance of resistance to adamantanes among influenza A (H3N2) and  
438 A (H1N1) viruses isolated worldwide. *Journal of Infectious Diseases* **196**, 249-257 (2007).
- 439 5 Hurt, A. C. The epidemiology and spread of drug resistant human influenza viruses. *Curr Opin*  
440 *Virology* **8**, 22-29 (2014).
- 441 6 Moscona, A. Global transmission of oseltamivir-resistant influenza. *New England Journal of*  
442 *Medicine* **360**, 953-956 (2009).
- 443 7 Watanabe, T. *et al.* Characterization of H7N9 influenza A viruses isolated from humans.  
444 *Nature* **501**, 551 (2013).
- 445 8 Zhu, H. *et al.* Infectivity, Transmission, and Pathology of Human-Isolated H7N9 Influenza  
446 Virus in Ferrets and Pigs. *Science* **341**, 183-186, doi:10.1126/science.1239844 (2013).
- 447 9 Imai, M. *et al.* A highly pathogenic avian H7N9 influenza virus isolated from a human is lethal  
448 in some ferrets infected via respiratory droplets. *Cell host & microbe* **22**, 615-626. e618  
449 (2017).
- 450 10 Koszalka, P., Tilmanis, D. & Hurt, A. C. Influenza antivirals currently in late-phase clinical trial.  
451 *Influenza and other respiratory viruses* **11**, 240-246 (2017).
- 452 11 De Clercq, E. & Li, G. Approved Antiviral Drugs over the Past 50 Years. *Clinical Microbiology*  
453 *Reviews* **29**, 695-747 (2016).
- 454 12 Furuta, Y. *et al.* In vitro and in vivo activities of anti-influenza virus compound T-705.  
455 *Antimicrob Agents Ch* **46**, 977-981 (2002).
- 456 13 Sidwell, R. W. *et al.* Efficacy of orally administered T-705 on lethal avian influenza A (H5N1)  
457 virus infections in mice. *Antimicrob Agents Ch* **51**, 845-851 (2007).
- 458 14 Kiso, M. *et al.* T-705 (favipiravir) activity against lethal H5N1 influenza A viruses. *Proceedings*  
459 *of the National Academy of Sciences* **107**, 882-887 (2010).
- 460 15 Furuta, Y. *et al.* T-705 (favipiravir) and related compounds: Novel broad-spectrum inhibitors  
461 of RNA viral infections. *Antiviral research* **82**, 95-102 (2009).
- 462 16 Sleeman, K. *et al.* In vitro antiviral activity of favipiravir (T-705) against drug-resistant  
463 influenza and 2009 A (H1N1) viruses. *Antimicrob Agents Ch* **54**, 2517-2524 (2010).
- 464 17 Furuta, Y. *et al.* Favipiravir (T-705), a novel viral RNA polymerase inhibitor. *Antiviral research*  
465 **100**, 446-454 (2013).
- 466 18 Furuta, Y., Komeno, T. & Nakamura, T. Favipiravir (T-705), a broad spectrum inhibitor of viral  
467 RNA polymerase. *Proceedings of the Japan Academy, Series B* **93**, 449-463,  
468 doi:10.2183/pjab.93.027 (2017).

- 469 19 Mendenhall, M. *et al.* T-705 (favipiravir) inhibition of arenavirus replication in cell culture.  
470 *Antimicrob Agents Ch* **55**, 782-787 (2011).
- 471 20 Mendenhall, M. *et al.* Effective oral favipiravir (T-705) therapy initiated after the onset of  
472 clinical disease in a model of arenavirus hemorrhagic Fever. *PLoS neglected tropical diseases*  
473 **5**, e1342 (2011).
- 474 21 Oestereich, L. *et al.* Successful treatment of advanced Ebola virus infection with T-705  
475 (favipiravir) in a small animal model. *Antiviral research* **105**, 17-21 (2014).
- 476 22 Safronetz, D. *et al.* The broad-spectrum antiviral favipiravir protects guinea pigs from lethal  
477 Lassa virus infection post-disease onset. *Scientific reports* **5**, 14775 (2015).
- 478 23 Oestereich, L. *et al.* Efficacy of favipiravir alone and in combination with ribavirin in a lethal,  
479 immunocompetent mouse model of Lassa fever. *The Journal of infectious diseases* **213**, 934-  
480 938 (2015).
- 481 24 Tani, H. *et al.* Efficacy of T-705 (Favipiravir) in the treatment of infections with lethal severe  
482 fever with thrombocytopenia syndrome virus. *mSphere* **1**, e00061-00015 (2016).
- 483 25 Delang, L., Abdelnabi, R. & Neyts, J. Favipiravir as a potential countermeasure against  
484 neglected and emerging RNA viruses. *Antiviral research* (2018).
- 485 26 Furuta, Y. *et al.* Mechanism of action of T-705 against influenza virus. *Antimicrob Agents Ch*  
486 **49**, 981-986 (2005).
- 487 27 Baranovich, T. *et al.* T-705 (favipiravir) induces lethal mutagenesis in influenza A H1N1  
488 viruses in vitro. *J Virol* **87**, 3741-3751 (2013).
- 489 28 Arias, A., Thorne, L. & Goodfellow, I. Favipiravir elicits antiviral mutagenesis during virus  
490 replication in vivo. *Elife* **3**, e03679 (2014).
- 491 29 de Ávila, A. I. *et al.* Lethal Mutagenesis of Hepatitis C Virus Induced by Favipiravir. *PLOS ONE*  
492 **11**, e0164691, doi:10.1371/journal.pone.0164691 (2016).
- 493 30 Barauskas, O. *et al.* Biochemical characterization of recombinant influenza A polymerase  
494 heterotrimer complex: Polymerase activity and mechanisms of action of nucleotide analogs.  
495 *PloS one* **12**, e0185998 (2017).
- 496 31 Vanderlinden, E. *et al.* Distinct effects of T-705 (favipiravir) and ribavirin on influenza virus  
497 replication and viral RNA synthesis. *Antimicrob Agents Ch* **60**, 6679-6691 (2016).
- 498 32 Sangawa, H. *et al.* Mechanism of action of T-705 ribosyl triphosphate against influenza virus  
499 RNA polymerase. *Antimicrob Agents Ch* **57**, 5202-5208 (2013).
- 500 33 Jin, Z., Smith, L. K., Rajwanshi, V. K., Kim, B. & Deval, J. The ambiguous base-pairing and high  
501 substrate efficiency of T-705 (favipiravir) ribofuranosyl 5'-triphosphate towards influenza A  
502 virus polymerase. *PloS one* **8**, e68347 (2013).
- 503 34 Jin, Z. *et al.* Structure-activity relationship analysis of mitochondrial toxicity caused by  
504 antiviral ribonucleoside analogs. *Antiviral research* **143**, 151-161 (2017).
- 505 35 Vanderlinden, E. *et al.* Distinct Effects of T-705 (Favipiravir) and Ribavirin on Influenza Virus  
506 Replication and Viral RNA Synthesis. *Antimicrob Agents Chemother* **60**, 6679-6691,  
507 doi:10.1128/AAC.01156-16 (2016).
- 508 36 Marathe, B. M. *et al.* Combinations of oseltamivir and T-705 extend the treatment window  
509 for highly pathogenic influenza A (H5N1) virus infection in mice. *Scientific reports* **6** (2016).
- 510 37 Delang, L. *et al.* Mutations in the chikungunya virus non-structural proteins cause resistance  
511 to favipiravir (T-705), a broad-spectrum antiviral. *Journal of Antimicrobial Chemotherapy* **69**,  
512 2770-2784 (2014).
- 513 38 Guedj, J. *et al.* Antiviral efficacy of favipiravir against Ebola virus: A translational study in  
514 cynomolgus macaques. *PLOS Medicine* **15**, e1002535, doi:10.1371/journal.pmed.1002535  
515 (2018).
- 516 39 Jabara, C. B., Jones, C. D., Roach, J., Anderson, J. A. & Swanstrom, R. Accurate sampling and  
517 deep sequencing of the HIV-1 protease gene using a Primer ID. *Proceedings of the National*  
518 *Academy of Sciences* **108**, 20166-20171 (2011).

- 519 40 Zhou, S., Jones, C., Mieczkowski, P. & Swanstrom, R. Primer ID Validates Template Sampling  
520 Depth and Greatly Reduces the Error Rate of Next-Generation Sequencing of HIV-1 Genomic  
521 RNA Populations. *J Virol* **89**, 8540-8555, doi:10.1128/JVI.00522-15 (2015).
- 522 41 Kosik, I. *et al.* Influenza A virus hemagglutinin glycosylation compensates for antibody  
523 escape fitness costs. *PLoS pathogens* **14**, e1006796 (2018).
- 524 42 Watson, S. J. *et al.* Viral population analysis and minority-variant detection using short read  
525 next-generation sequencing. *Phil. Trans. R. Soc. B* **368**, 20120205 (2013).
- 526 43 Sheward, D. J., Murrell, B. & Williamson, C. Degenerate Primer IDs and the Birthday  
527 Problem. *Proceedings of the National Academy of Sciences* **109**, E1330-E1330,  
528 doi:10.1073/pnas.1203613109 (2012).
- 529 44 Long, J. S. *et al.* Species difference in ANP32A underlies influenza A virus polymerase host  
530 restriction. *Nature* **529**, 101, doi:10.1038/nature16474 (2016).
- 531 45 Zhou, B. *et al.* Single-reaction genomic amplification accelerates sequencing and vaccine  
532 production for classical and Swine origin human influenza A viruses. *J Virol* **83**, 10309-10313  
533 (2009).
- 534 46 Jabara, C. B., Jones, C. D., Roach, J., Anderson, J. A. & Swanstrom, R. Accurate sampling and  
535 deep sequencing of the HIV-1 protease gene using a Primer ID. *Proc Natl Acad Sci U S A* **108**,  
536 20166-20171, doi:10.1073/pnas.1110064108 (2011).
- 537 47 Pauly, M. D., Procario, M. & Luring, A. S. The mutation rates and mutational bias of  
538 influenza A virus. *bioRxiv*, doi:10.1101/110197 (2017).
- 539 48 Visher, E., Whitefield, S. E., McCrone, J. T., Fitzsimmons, W. & Luring, A. S. The Mutational  
540 Robustness of Influenza A Virus. *Plos Pathogens* **12**, doi:10.1371/journal.ppat.1005856  
541 (2016).
- 542 49 Pauly, M. D. & Luring, A. S. Effective Lethal Mutagenesis of Influenza Virus by Three  
543 Nucleoside Analogs. *J Virol* **89**, 3584-3597, doi:10.1128/Jvi.03483-14 (2015).

544

545 Figure Legends

546 **Figure 1- Primer ID Method for determining mutation bias.** RNA was extracted and a  
547 unique barcode of the form NNNNTNNNNTNNNN added during reverse transcription. qPCR  
548 was used to standardize the number of barcodes for NGS. Samples were sequenced and  
549 barcodes matched to allow removal of PCR and sequencing errors.

550 **Figure 2- Favipiravir causes transition mutations which reduces polymerase activity in a**  
551 **minigenome assay. A)** Minigenome Assay. Plasmids were transfected into 293-T cells and  
552 favipiravir was added. At ~21hrs the cells were lysed and luciferase activity was measured.  
553 The relative polymerase activity is calculated as firefly activity / renilla activity. **B)** A reporter  
554 plasmid (HA pol1) from the minigenome above was sequenced using Primer ID and NGS.  
555 The mutations were tallied as described in Methods. Two independent biological samples  
556 were sequenced for each concentration of drug in the same sequencing reaction. The  
557 number of mutations per 10,000 nucleotides above the average of the two control samples  
558 were compared for each sample. **C)** The number of mutations per 10,000 nucleotides above  
559 the control for each sample was calculated for transitions and transversions. **D)** As 1C  
560 calculated for each class of transition mutation. The values are calculated as the mutation  
561 rate for an individual base. The average for the two samples is plotted. **E)** qPCR was  
562 performed on the luciferase reporter mRNA from a minigenome assay.  $\Delta\Delta C_t$  was calculated  
563 using 18sRNA and results are shown normalized to the drug-free control. N=6. \*\*\* p<0.001.

564 **Supplemental figure 1- Determination of the optimal cut-off for number of reads per**  
565 **barcode.** The cut-off for the number of reads necessary to include a barcode was  
566 systematically varied and the number of mutations per 10,000 nucleotides above the  
567 control plotted for each sample.



568 **Figure 3- Favipiravir causes transition mutations reducing viral fitness. A)** Virus was added  
569 to MDCK cells at a high MOI of 1.3 and favipiravir was added at an appropriate  
570 concentration diluted in DMSO. The supernatant was plaqued after 20 hours and the titre  
571 calculated in plaque forming units/ml. N=3. **B)** After 18 hours the cells were lysed and the  
572 RNA extracted for sequencing using Primer ID. The number of mutations per 10,000  
573 nucleotides above the control was plotted for each sample. **C)** The number of mutations per  
574 10,000 nucleotides above the control for each sample was calculated for transitions and  
575 transversions. **D)** The number of mutations per 10,000 nucleotides above the control for  
576 each sample was calculated for each class of transition mutation. The values are calculated  
577 as the mutation rate for an individual base.

578 **Supplemental figure 2- A method to analyse mutation bias from whole genome NGS data.**

579 Whole genome sequencing data from a standard pipeline was aligned to a reference. The  
580 most common polymorphism for each site in the genome was calculated. These  
581 polymorphisms were summed up and the mutation bias of different samples can be  
582 compared.

583 **Figure 4- Next-generation sequencing data shows that favipiravir acts as a guanine**

584 **analogue.** Virus was added to MDCK cells at a high MOI of 1 and drug was added as  
585 previously described. Supernatant was taken and was sequenced and analysed as described  
586 in *Methods*. The most common polymorphism for each base is shown for virus exposed to  
587 drug and to a drug free control. The comparison shows the difference in percentage for  
588 each class of mutations revealing mutation bias.

589 **Supplemental figure 3-** A permutation analysis was performed on the mutation data. The

590 substitutions were randomized between the treatment and control and either the total

591 difference in mutation bias was calculated (A, C, E) or the bias for acting as a guanine  
592 analogue (B, D, F.) 10,000 permutations were performed for each analysis. The red bars  
593 show the observed value where it occurs within the values generated by the permutations.  
594 **A)** The mutation bias for 10  $\mu$ M favipiravir was compared to the control (observed value =  
595 0.39;  $p < 1 \cdot 10^{-4}$ ). **B)** The difference in bias for guanine mutations (observed value = 0.19;  
596  $p < 1 \cdot 10^{-4}$ ). **C)** The mutation bias for 100  $\mu$ M favipiravir was compared to the control  
597 (observed value = 0.37;  $p < 1 \cdot 10^{-4}$ ). **D)** The difference in bias for guanine mutations  
598 (observed value = 0.19;  $p < 1 \cdot 10^{-4}$ ). **E)** The mutation bias for 10  $\mu$ M favipiravir was  
599 compared to 100  $\mu$ M favipiravir (observed value = 0.03;  $p = 0.26$ ). **F)** The difference in bias for  
600 guanine mutations (observed value = 0.007;  $p = 0.34$ ).

601 **Supplemental figure 4-** The same data from Figure 3 was reanalysed using only the 500 sites  
602 with the largest degree of polymorphism.

603 **Figure 5-** A schematic showing how favipiravir causes mutations during +ve and -ve strand  
604 synthesis.

605

**Figure 1**  
Minigenome Assay

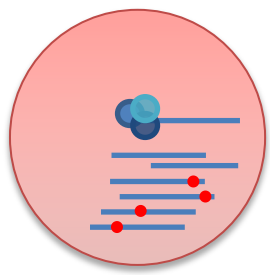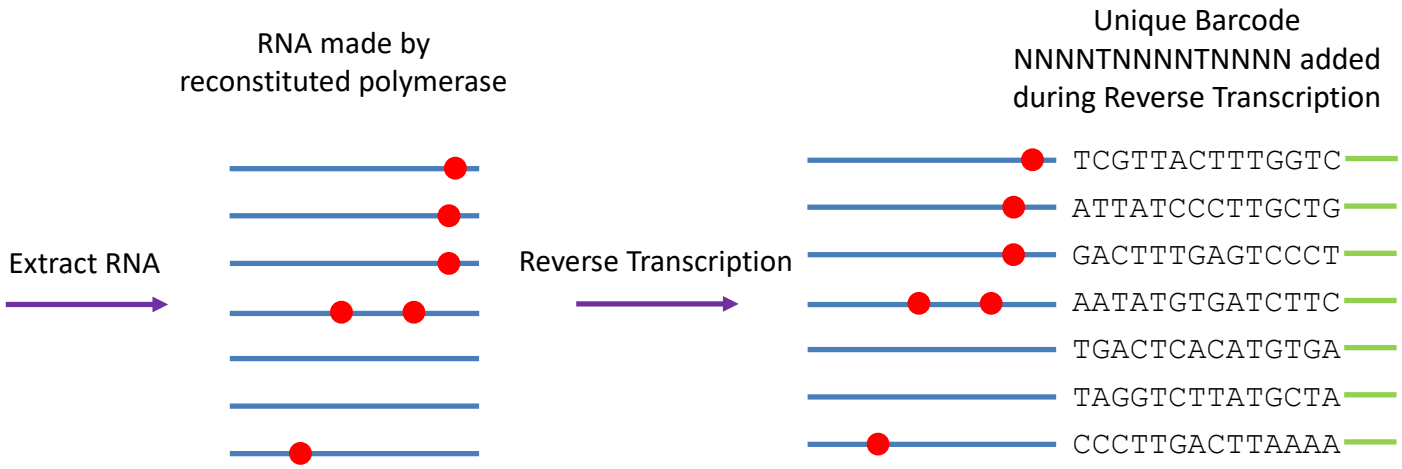

qPCR to standardize number of barcodes

PCR and NGS sample prep

Next generation sequencing

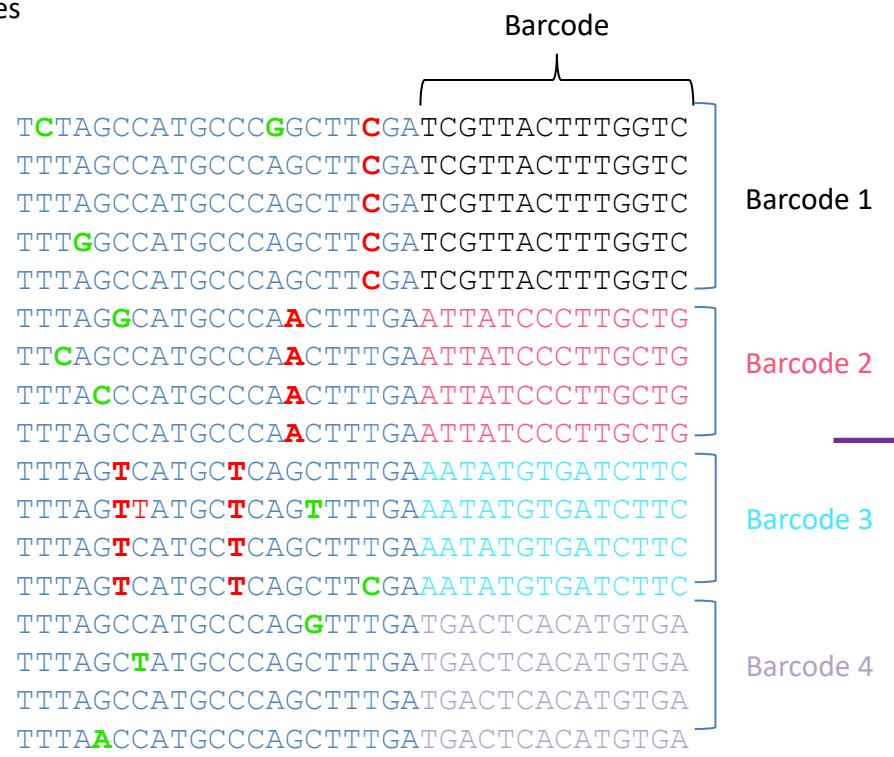

Match barcodes to remove sequencing errors and identify errors caused by the viral polymerase

Figure 2

**A**

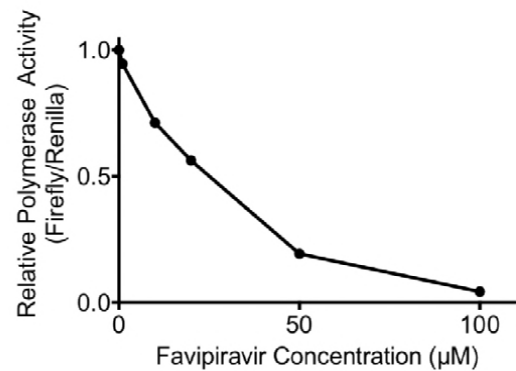

**B**

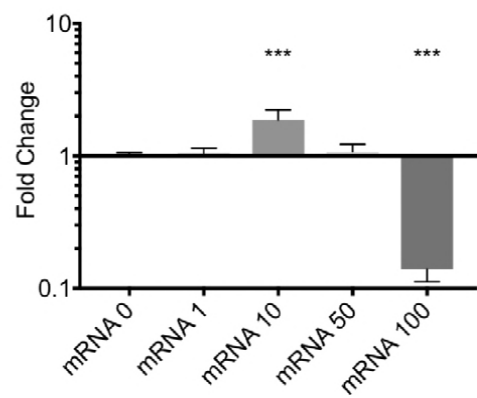

**C**

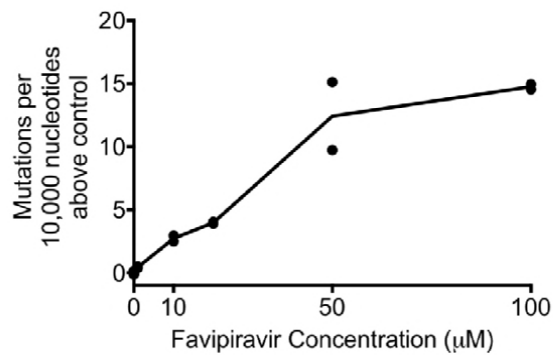

**D**

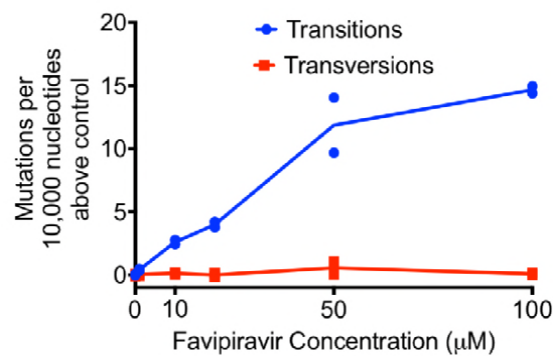

**E**

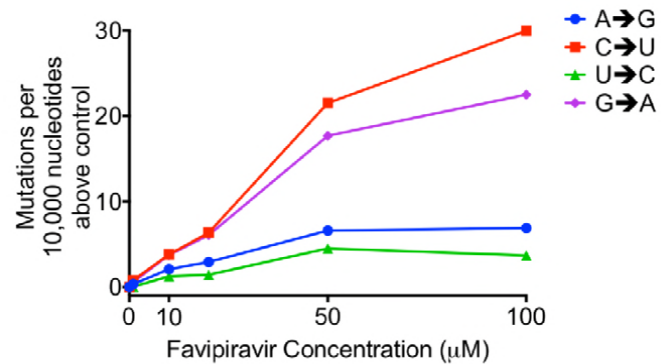

Supplementary Figure 1

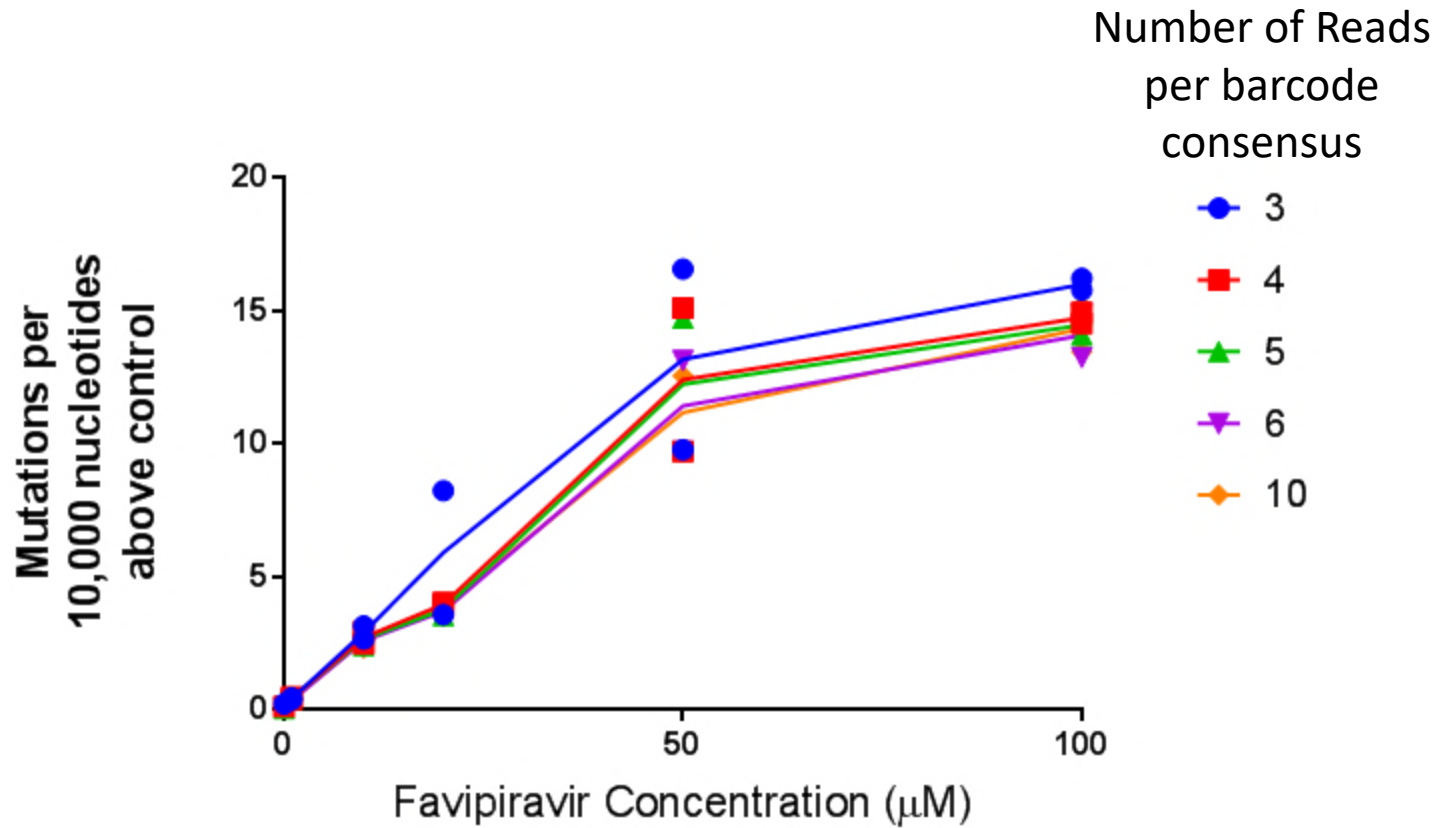

Figure 3

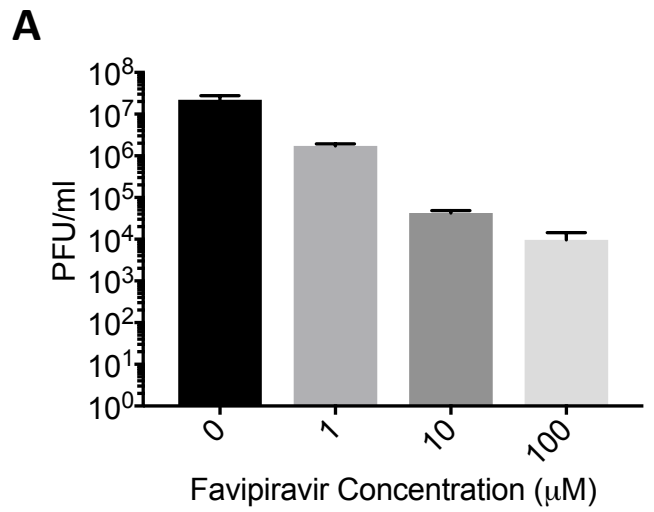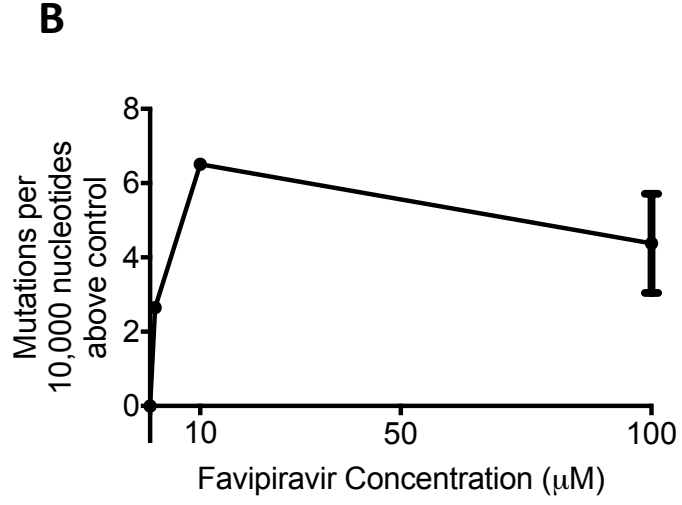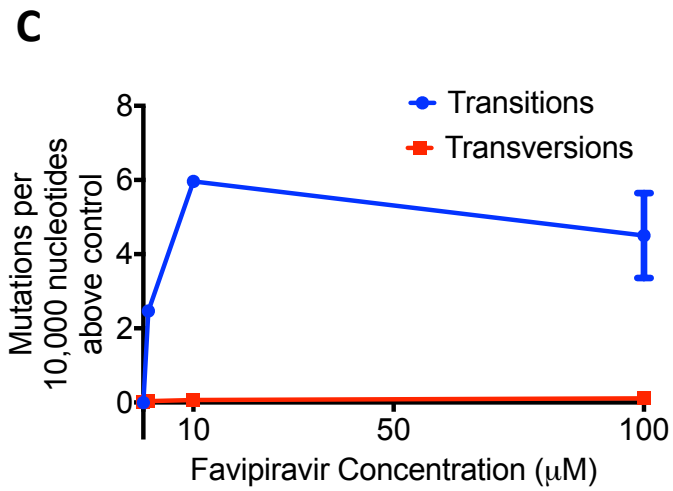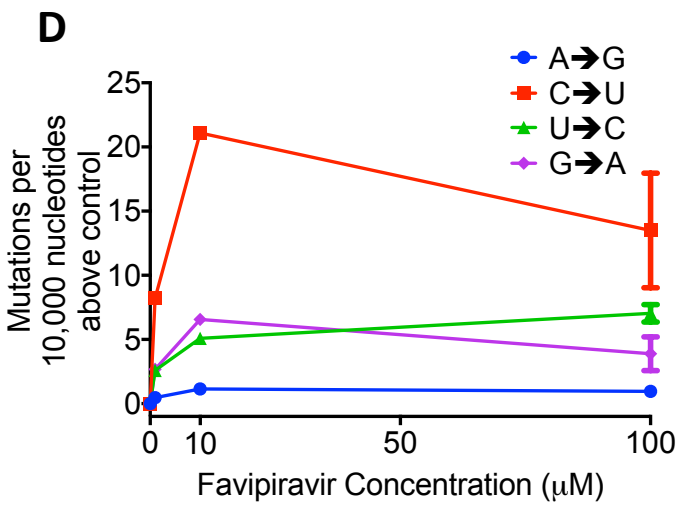

# Supplemental Figure 2

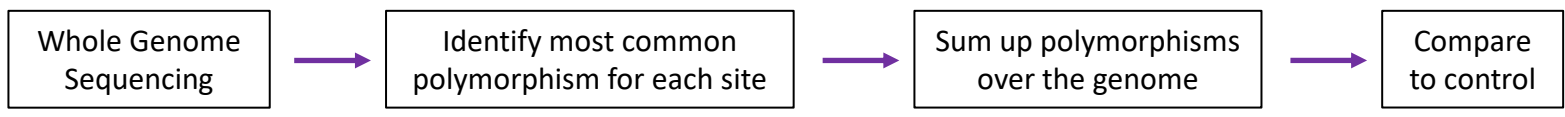

NGS Reads

```

    CATATACGACACTGCGCGCCGGCATAACGCCTCCGCTA
    CATATACGACACTGCGCGCCGGCATAACGCTTCCGCTAGAGCTA
    CATATAGGACACTGCGCGCCGGCATAACGCTTCCGCTAGAGCTATTCG
    CATATACGACACTGCGGGCCGGCATAACGCTTCCGCTAGGGCTATTCGTACATG
    CATATACGACACTGCGCGCCGGCATAACGCTTCCGCTAGGGCTATTCGTACATG
    CATATACGACACTGCGCGCCGGCATAACGCTTCTGCTAGGGCTATTCATACATG
    CATTTACGACACTGCGTGCCGGCATAACGCTTCCGCTAGGGCTATTCGTACATG
    CATATAGGACACTGCGCGCCGGCGTACGCTTCCGCTAGGGCTATTCGTACATG
    CATATACGACACTGCGCGCCGGCATAACGCTTCCGCTAGAGCTATTCGTACATG
    CATATACGACACTGCGTGCCGGCATAACGCTTCCGCTAGGGCTATTCGTACATA
    CATATACGACACTGCGCGCCGGCATAACGCCTCCGCTAGGGCTATTCGTACATG
    TATACGACATTGCGCGCCGGCATAACGCTTCCGCTAGGGCTATTCGTATATG
    TACGACACTGCGCGCCGGTATACGCTTCCGCTAGAGCTATTCGTACATG
    GACACTGCGCGCTGGCATAACGCTTCCGCTAGAGCTATTCGTACATG
  
```

Most Common Polymorphism

```

    ---T--G----T----T--T--TG-----C--T-----A-----A--T--A
  
```

|                                        | Treatment |      |      |      | Control |   |      |      | Comparison to control |      |   |       |       |       |       |
|----------------------------------------|-----------|------|------|------|---------|---|------|------|-----------------------|------|---|-------|-------|-------|-------|
|                                        | →         | A    | C    | U    | G       | → | A    | C    | U                     | G    | → | A     | C     | U     | G     |
| Sum up polymorphisms across the genome | A         | *    | 93   | 50   | 2597    | A | *    | 129  | 119                   | 2213 | A | *     | -0.01 | -0.01 | -0.02 |
|                                        | C         | 231  | *    | 1713 | 8       | C | 579  | *    | 708                   | 27   | C | -0.05 | *     | 0.09  | 0.00  |
|                                        | U         | 73   | 1801 | *    | 33      | U | 130  | 1543 | *                     | 72   | U | -0.01 | -0.02 | *     | -0.01 |
|                                        | G         | 2349 | 9    | 183  | *       | G | 1098 | 47   | 553                   | *    | G | 0.10  | -0.01 | -0.06 | *     |

Figure 4

Number of polymorphisms

Comparison to control

Control

| → | A    | C    | U   | G    |
|---|------|------|-----|------|
| A | *    | 129  | 119 | 2213 |
| C | 579  | *    | 708 | 27   |
| U | 130  | 1543 | *   | 72   |
| G | 1098 | 47   | 553 | *    |

10uM Favipiravir

| → | A    | C    | U    | G    |
|---|------|------|------|------|
| A | *    | 93   | 50   | 2597 |
| C | 231  | *    | 1713 | 8    |
| U | 73   | 1801 | *    | 33   |
| G | 2349 | 9    | 183  | *    |

| → | A     | C     | U     | G     |
|---|-------|-------|-------|-------|
| A | *     | -0.01 | -0.01 | -0.02 |
| C | -0.05 | *     | 0.09  | 0.00  |
| U | -0.01 | -0.02 | *     | -0.01 |
| G | 0.10  | -0.01 | -0.06 | *     |

100uM Favipiravir

| → | A    | C    | U    | G    |
|---|------|------|------|------|
| A | *    | 128  | 47   | 2452 |
| C | 230  | *    | 1572 | 16   |
| U | 64   | 1791 | *    | 47   |
| G | 2273 | 12   | 157  | *    |

| → | A     | C     | U     | G     |
|---|-------|-------|-------|-------|
| A | *     | 0.00  | -0.01 | -0.03 |
| C | -0.05 | *     | 0.08  | 0.00  |
| U | -0.01 | -0.01 | *     | 0.00  |
| G | 0.11  | -0.01 | -0.06 | *     |



# Supplemental Figure 3

**A**  
10 $\mu$ M Favipiravir vs. Control

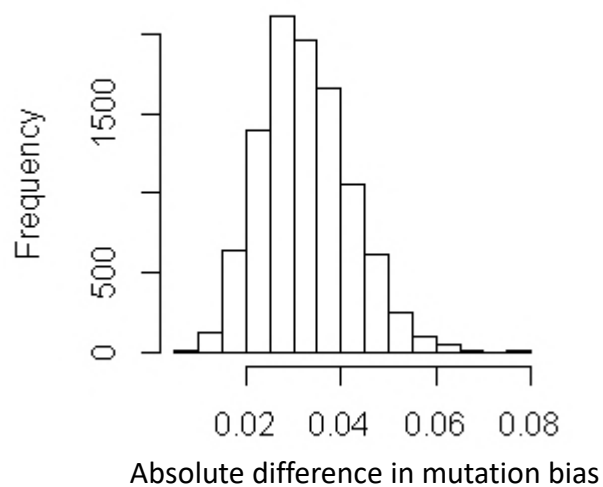

**C**  
100 $\mu$ M Favipiravir vs. Control

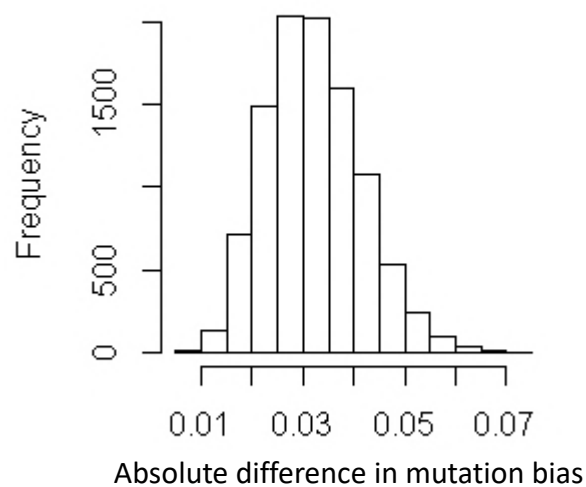

**E**  
10 $\mu$ M vs 100 $\mu$ M Favipiravir

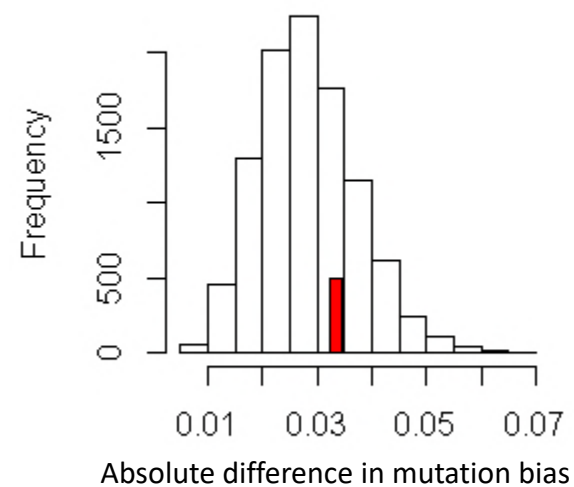

**B**

Frequency

Guanine mutation bias

Detailed description: Histogram B shows the distribution of Guanine mutation bias. The x-axis ranges from 0.000 to 0.030 with major ticks at 0.000, 0.010, 0.020, and 0.030. The y-axis represents frequency, with major ticks at 0, 400, and 800. The distribution is unimodal and roughly bell-shaped, peaking at approximately 0.005 with a frequency of about 1000.

**D**

Frequency

Guanine mutation bias

Detailed description: Histogram D shows the distribution of Guanine mutation bias. The x-axis ranges from 0.000 to 0.030 with major ticks at 0.000, 0.010, 0.020, and 0.030. The y-axis represents frequency, with major ticks at 0, 200, 600, and 1000. The distribution is unimodal and roughly bell-shaped, peaking at approximately 0.005 with a frequency of about 1000.

**F**

Frequency

Guanine mutation bias

Detailed description: Histogram F shows the distribution of Guanine mutation bias. The x-axis ranges from 0.000 to 0.020 with major ticks at 0.000, 0.010, and 0.020. The y-axis represents frequency, with major ticks at 0, 400, and 800. The distribution is unimodal and roughly bell-shaped, peaking at approximately 0.005 with a frequency of about 1000. A single bar at approximately 0.007 is highlighted in red.

# Supplemental Figure 4

|               | <u>Control</u> |     |    |     |               | <u>Drug - 10<math>\mu</math>M Favipiravir</u> |    |     |    |
|---------------|----------------|-----|----|-----|---------------|-----------------------------------------------|----|-----|----|
| $\rightarrow$ | A              | C   | U  | G   | $\rightarrow$ | A                                             | C  | U   | G  |
| A             | *              | 4   | 2  | 209 | A             | *                                             | 0  | 1   | 66 |
| C             | 22             | *   | 41 | 1   | C             | 5                                             | *  | 133 | 0  |
| U             | 4              | 144 | *  | 3   | U             | 1                                             | 53 | *   | 0  |
| G             | 52             | 1   | 17 | *   | G             | 237                                           | 0  | 4   | *  |

## Comparison between Drug and Control

| $\rightarrow$ | A     | C     | U     | G     |
|---------------|-------|-------|-------|-------|
| A             | *     | -0.01 | 0.00  | -0.29 |
| C             | -0.03 | *     | 0.18  | 0.00  |
| U             | -0.01 | -0.18 | *     | -0.01 |
| G             | 0.37  | 0.00  | -0.03 | *     |

Figure 5

### Guanine Analogue

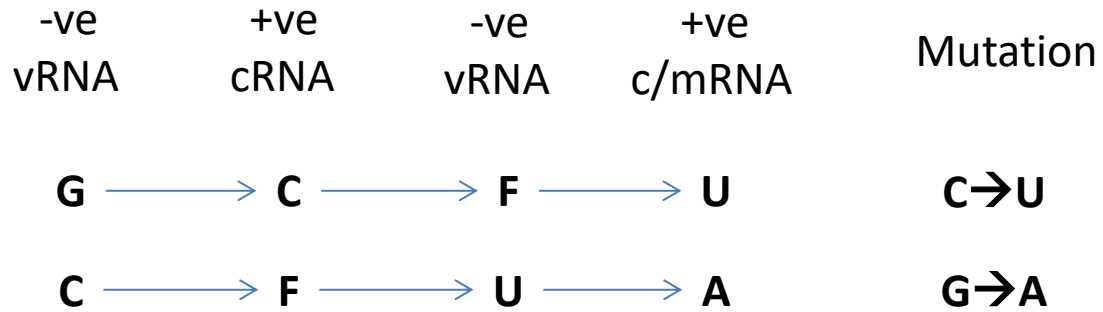

### Adenine Analogue

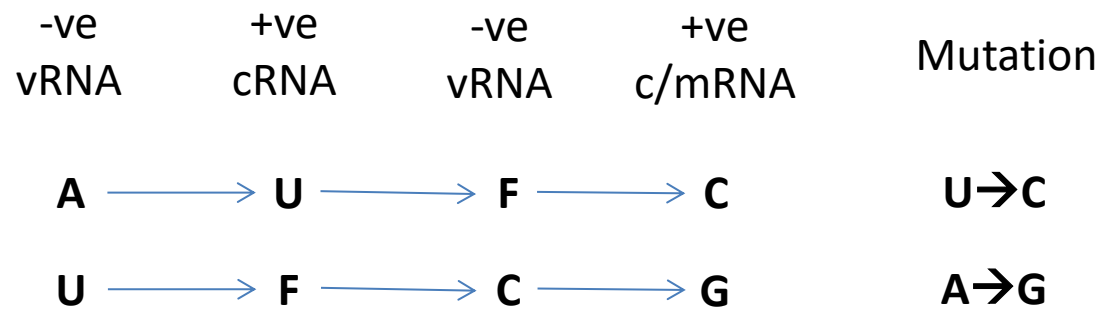

Source: http://biorxiv.org/content/10.1101/375378v1.full.pdf
